# Supplementary material for: A new reassortment of influenza A (H7N9) virus causing human infection in Beijing, 2014
Source: PubMed Central journal article supplement (PMC4882526; doi:10.1038/srep26624), 2016-05-27
Supplement: srep26624-s1.pdf [file srep26624-s1.pdf]

# A new reassortant of influenza A (H7N9) virus causing human infection in Beijing, 2014

Yuhai Bi<sup>1,2,3</sup>, Jingyuan Liu<sup>4</sup>, Haofeng Xiong<sup>4</sup>, Yue Zhang<sup>5,6</sup>, Di Liu<sup>2,3,7</sup>, Yingxia Liu<sup>1</sup>, George F. Gao<sup>1,2,3</sup> and Beibei Wang<sup>5,6\*</sup>

**Table S1. The primers used for amplifying the eight gene segments**

| Genes      | Primers                                      | Genes                                      | Primers                                     |
|------------|----------------------------------------------|--------------------------------------------|---------------------------------------------|
| <b>HA</b>  | HA-F: 5'-gTC TCA ggg AgC AAA AgC Agg gg-3'   | <b>PA</b>                                  | PA-S-F: 5'-ggg AgC gAA AgC Agg TAC-3'       |
|            | HA-R: 5'-Tgg AgT AgA AAC AAg ggT gTT TT-3'   |                                            | PA-S-R: 5'-TNg TYC TRC AYT TgC TTA TCA T-3' |
| <b>NA</b>  | NA-F: 5'-AT ggA gCA AAA gCA ggA gT-3'        | <b>NP</b>                                  | PA-X-F: 5'-CAT TgA ggg CAA gCT TTC-3'       |
|            | NA-R: 5'-ggCC AgT AgA AAC AAg gAg TTT TTT-3' |                                            | PA-X-R: 5'-CCg gAg TAg AAA CAA ggT ACT T-3' |
| <b>PB2</b> | PB2-S-F: 5'-TAgg AgC gAA AgC Agg TC-3'       | <b>M</b>                                   | NP-F: 5'-TAgg A gCA AAA gCA ggg TA-3'       |
|            | PB2-S-R: 5'-TCY TCY TgT gAR AAY ACC AT-3'    |                                            | NP-R: 5'-Tgg AgT AgA AAC AAg ggT ATT TTT-3' |
|            | PB2-X-F: 5'-TAY gAR gAR TTC ACA ATg gT-3'    |                                            | M-F: 5'-ACgg A gCA AAA gCA ggT Ag-3'        |
| <b>PB1</b> | PB2-X-R: 5'-ggA gTA gAA ACA Agg TCg TTT-3'   | M-R: 5'-Cgg AgT AgA AAC AAg gTA gTT TTT-3' | <b>NS</b>                                   |
|            | PB1-S-F: 5'-ATT TAg CgA AAg CAg gCA-3'       | NS-F: 5'-TggA A gCA AAA gCA ggg Tg-3'      |                                             |
|            | PB1-S-R: 5'-TTR AAC ATg CCC ATC ATC AT-3'    | NS-R: 5'-Tgg AgT AgA AAC AAg ggT gTT TT-3' |                                             |
|            | PB1-X-F: 5'-ARA TAC CNg CAg ARA TgC T-3'     |                                            |                                             |
|            | PB1-X-R: 5'-Tgg AgT AgA AAC AAg gCA TTT-3'   |                                            |                                             |
